# Supplementary material for: DARPin_9-29-Targeted Gold Nanorods Selectively Suppress HER2-Positive Tumor Growth in Mice
Source: MDPI journal article supplement (doi:10.3390/cancers13205235), 2021-10-19
Supplement: s1 [file s1]

Supplementary Materials

# DARPin\_9-29-Targeted Gold Nanorods Selectively Suppress HER2-Positive Tumor Growth in Mice

Galina M. Proshkina, Elena I. Shramova, Marya V. Shilova, Ivan V. Zelepukin, Victoria O. Shipunova, Anastasia V. Ryabova, Sergey M. Deyev and Alexander B. Kotlyar

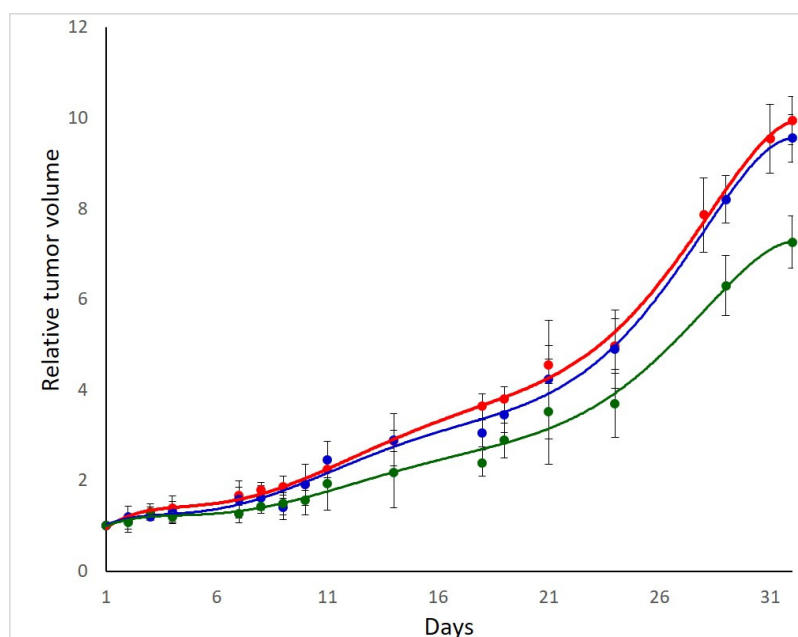

**Figure S1.** Effect of DARPin-GNRs on tumor growth dynamics in mice. Mice were injected with PBS (red and blue curves) and DARPin-GNRs (green curve). The tumour area in mice was illuminated by NIR laser (blue and green curves) as described in Materials and Methods. Bars indicate SD;  $p < 0.05$ .

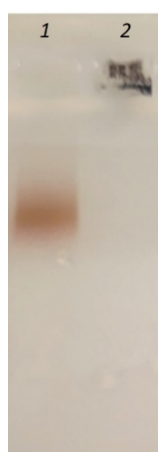

**Figure S2.** Electrophoresis of BSA-DARPin-GNRs (lane 1) and -bare GNRs (lane 2). The electrophoresis was conducted in 2% agarose gel as described in Materials and Methods.
